# Supplementary material for: Mechanism of ammonium sulfate regulation effect on microstructure of Y2O3 nanopowders via urea precipitation method
Source: Royal Society of Chemistry journal article supplement (doi:10.1039/c3ce40186c), 2013-01-01
Supplement: c3ce40186c.pdf [file c3ce40186c.pdf]

# Mechanism of Ammonium Sulfate Regulation Effect on Microstructure of $Y_2O_3$ Nanopowders via Urea Precipitation Method

Haiming Qin <sup>a,b</sup>, Xinhai Zhang <sup>b</sup>, Hong Liu <sup>a,c\*</sup>, Yuanhua Sang <sup>a\*</sup>, Jiyang Wang <sup>a</sup>

<sup>a</sup> State Key Laboratory of Crystal Materials, Shandong University, 27 Shandan Road, Jinan,  
250100, China

<sup>b</sup> Institute of Materials Research and Engineering, 3 Research Link, 117602, Singapore

<sup>c</sup> Beijing Institute of Nanoenergy and Nanosystems, Chinese Academy of Science, Beijing 100864,  
China

## \*Corresponding authors

H. Liu Email: [hongliu@sdu.edu.cn](mailto:hongliu@sdu.edu.cn) Tel.: +86-531-88362807; fax: +86-531-88362807

Y. Sang, Email: [sangyh@sdu.edu.cn](mailto:sangyh@sdu.edu.cn)

Supplementary Information:

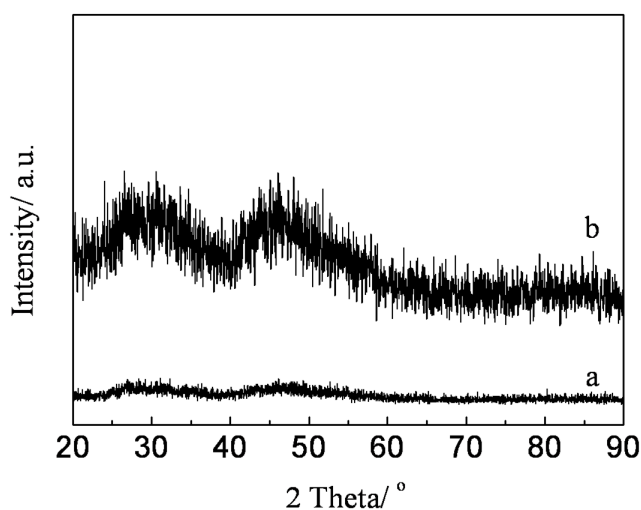

Figure S1. XRD pattern of the precursor prepared via urea precipitation method: from the  $(NH_4)_2SO_4$  free solution (a) and from the saturated  $(NH_4)_2SO_4$  solution (b)
